# Supplementary material for: A globally distributed dataset of coseismic landslide mapping via multi-source high-resolution remote sensing images
Source: Copernicus journal article supplement (doi:10.5194/essd-16-4817-2024), 2024-10-24
Supplement: Supplementary file 1 [file essd-16-4817-2024-supplement.pdf]

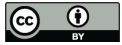

*Supplement of*

## **A globally distributed dataset of coseismic landslide mapping via multi-source high-resolution remote sensing images**

**Chengyong Fang et al.**

*Correspondence to:* Xuanmei Fan (fxm\_cdut@qq.com)

The copyright of individual parts of the supplement might differ from the article licence.

Figure S1 to S9:

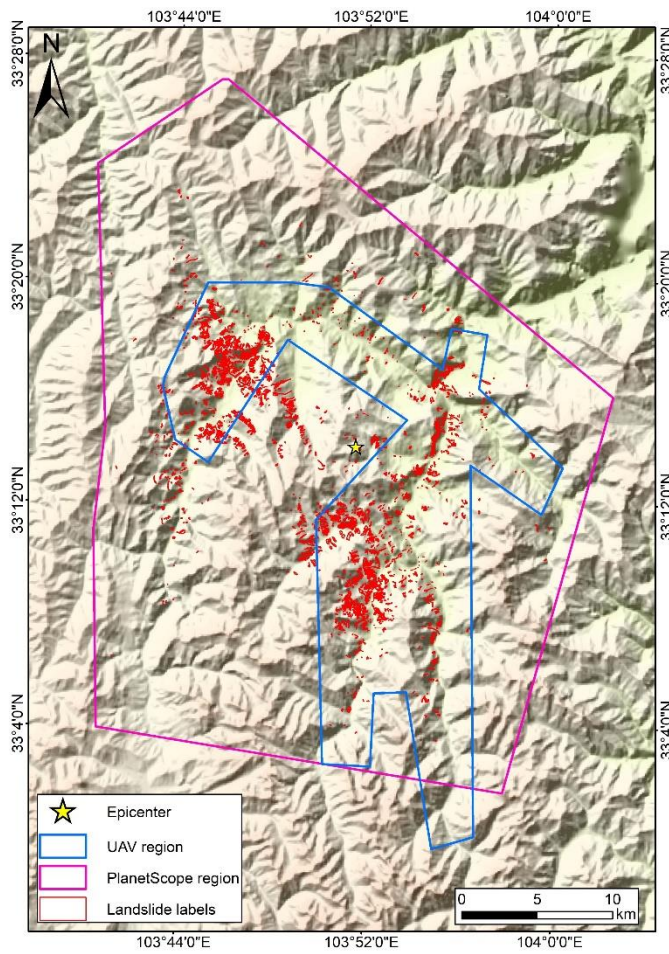

Figure.S1 Multi-source image range and landslide distribution of Jiuzhaigou earthquake

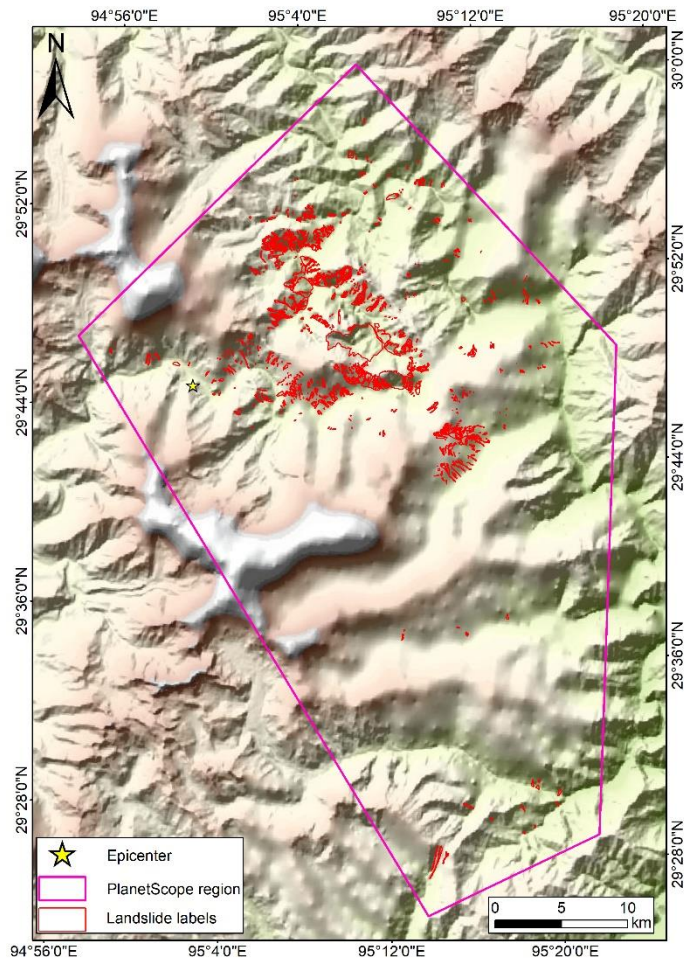

**Figure.S2** PlanetScope image range and landslide distribution of the Mainling earthquake

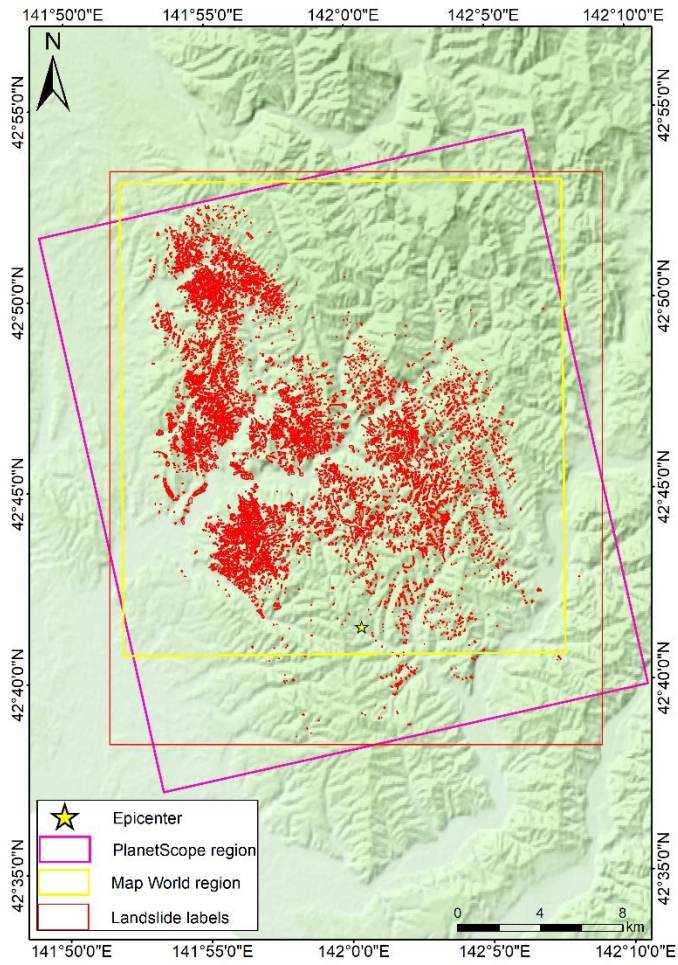

**Figure.S3** Multi-source image range and landslide distribution of Hokkaido earthquake

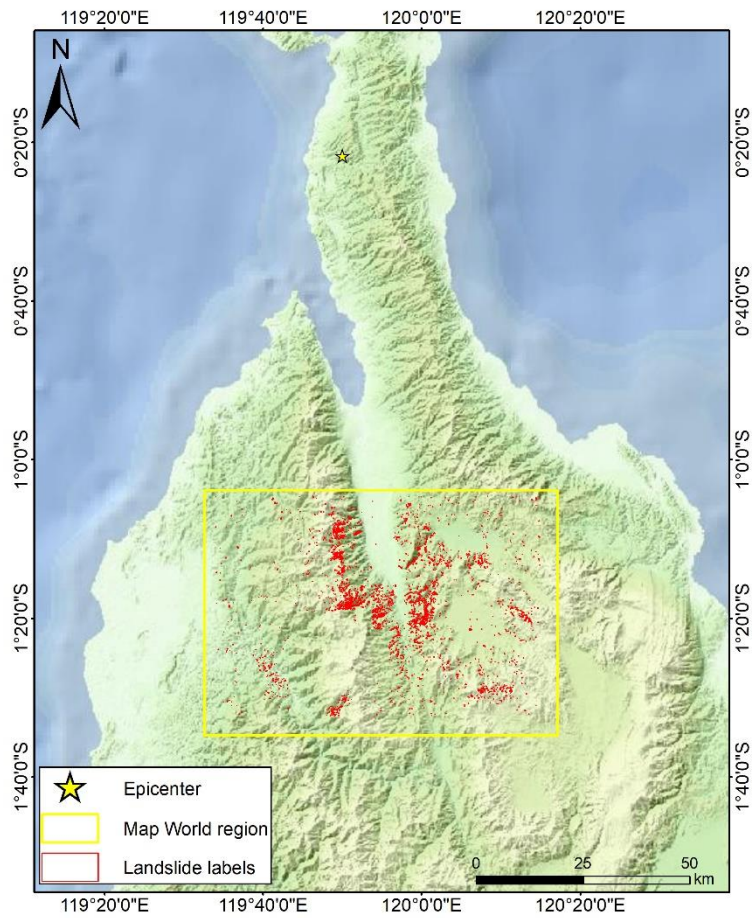

**Figure.S4** Map World image range and landslide distribution of the Palu

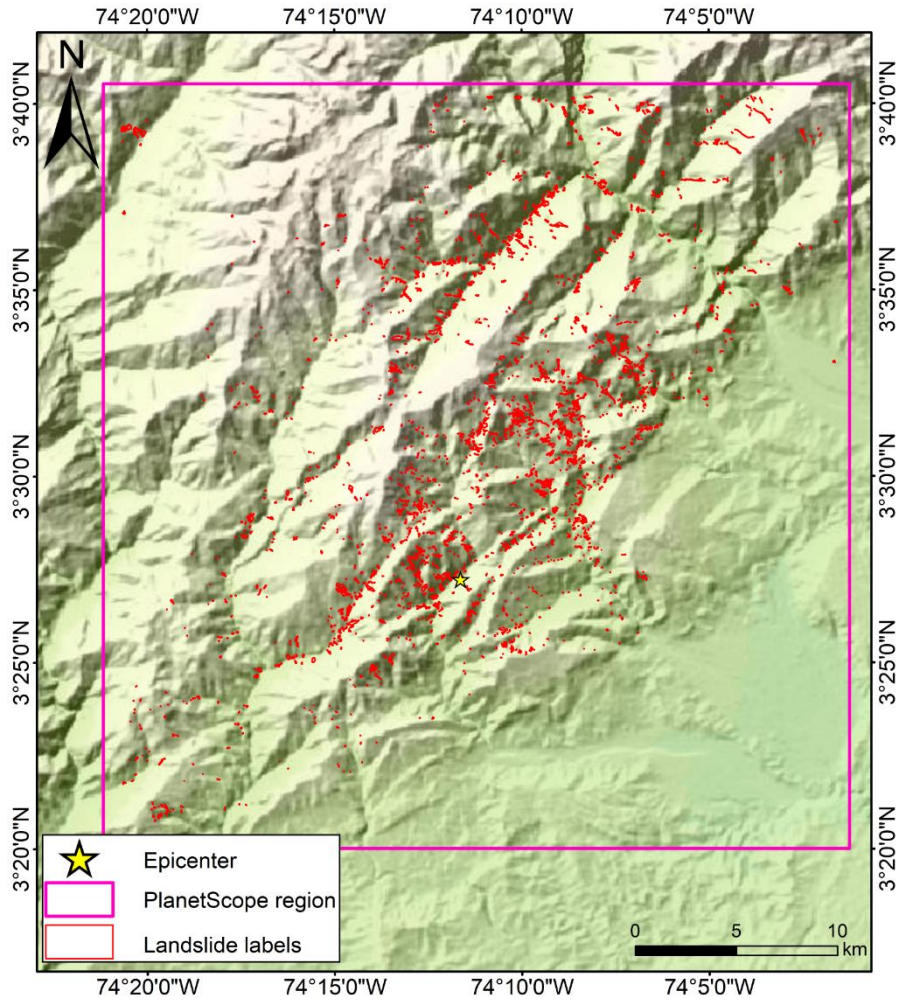

**Figure.S5** PlanetScope image range and landslide distribution of the Mesetas earthquake

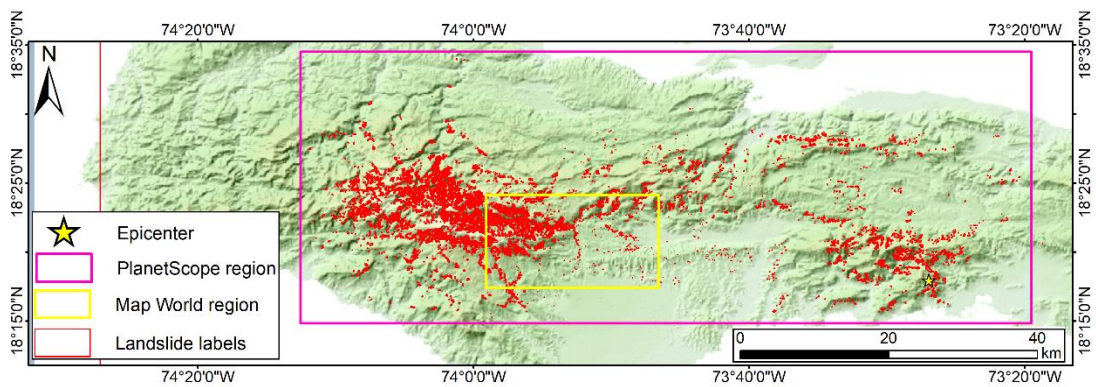

**Figure.S6** Multi-source image range and landslide distribution of Nippes earthquake.

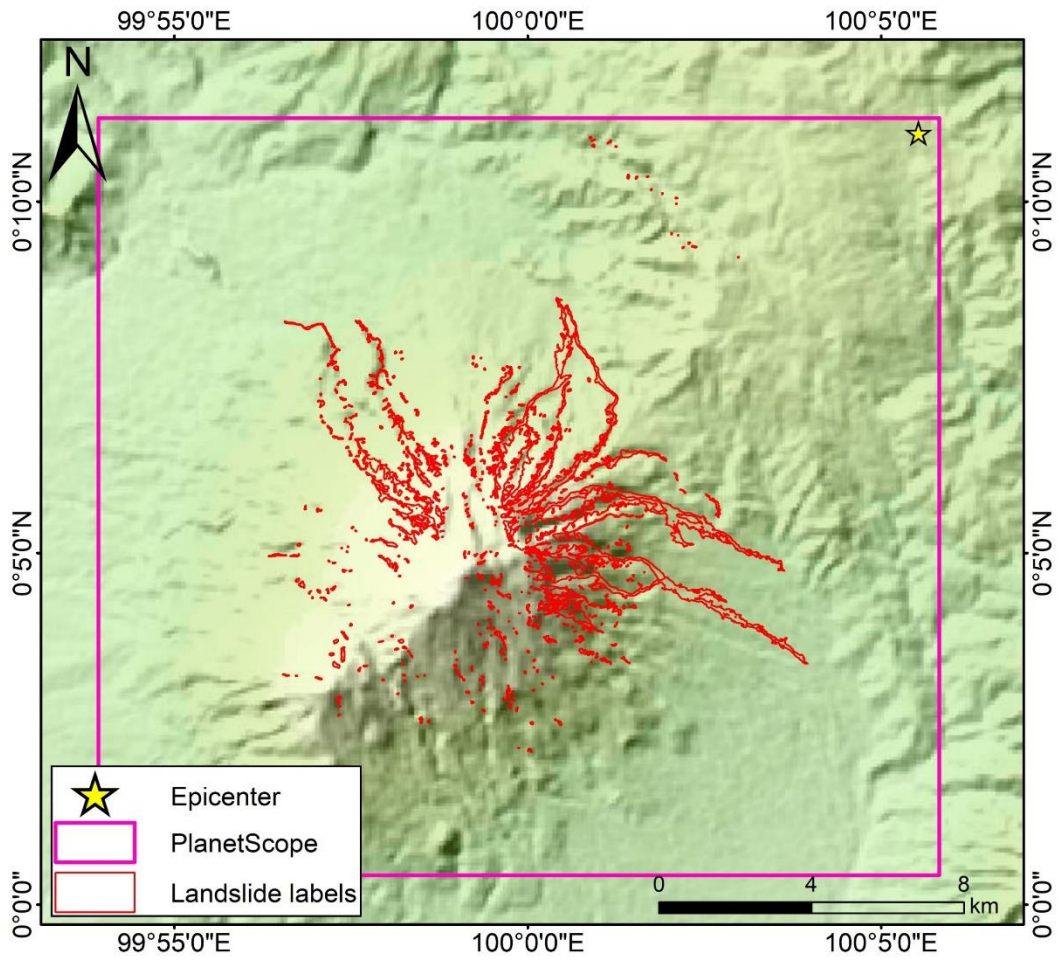

**Figure.S7** PlanetScope image range and landslide distribution of the Sumatra earthquake

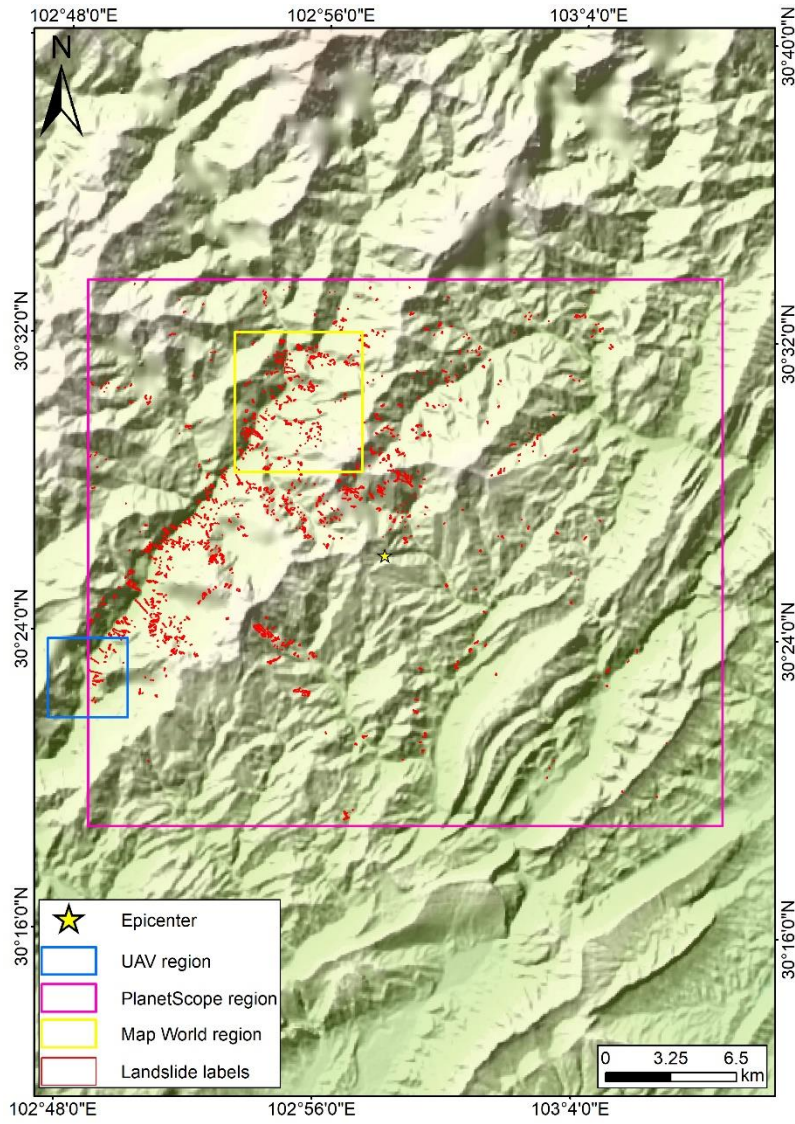

**Figure.S8** Multi-source image range and landslides distribution of Lushan earthquake.



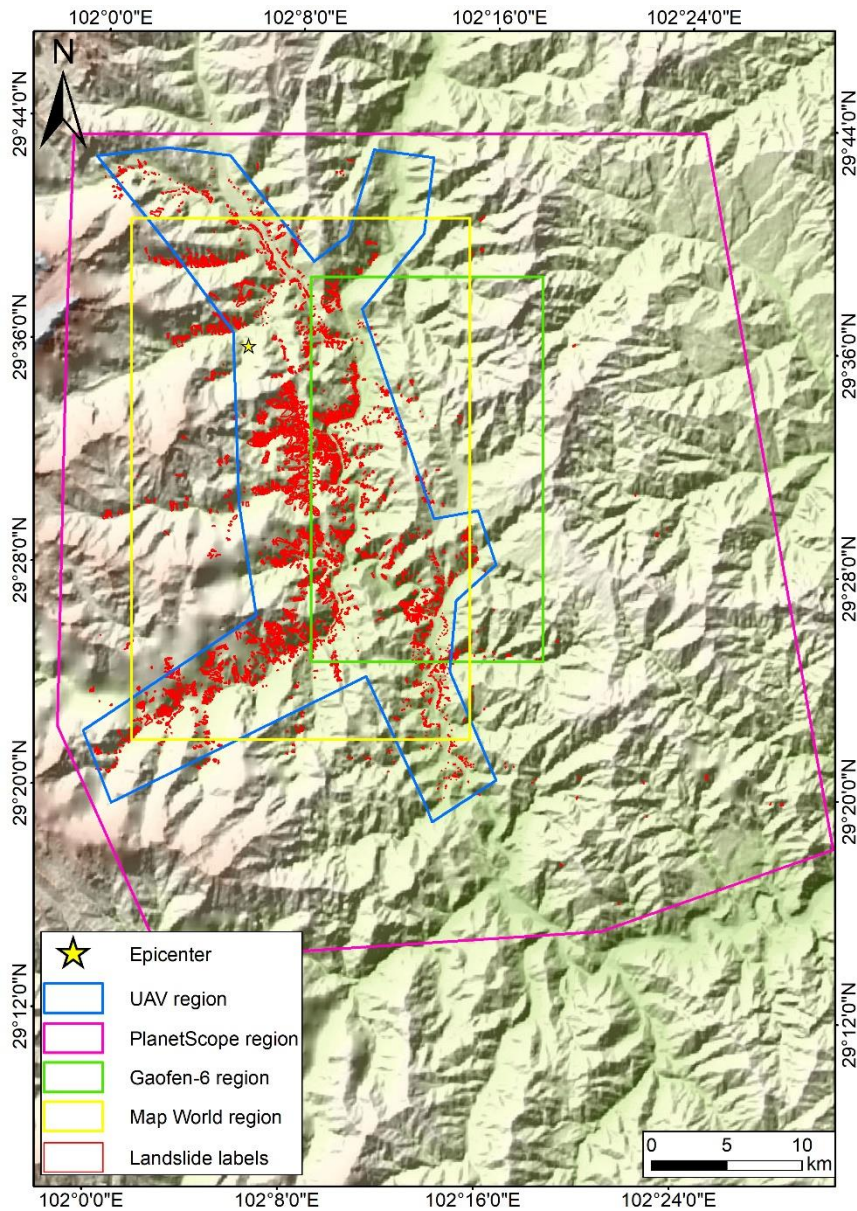

**Figure.S9** Multi-source image range and landslide distribution of Lushan earthquake.

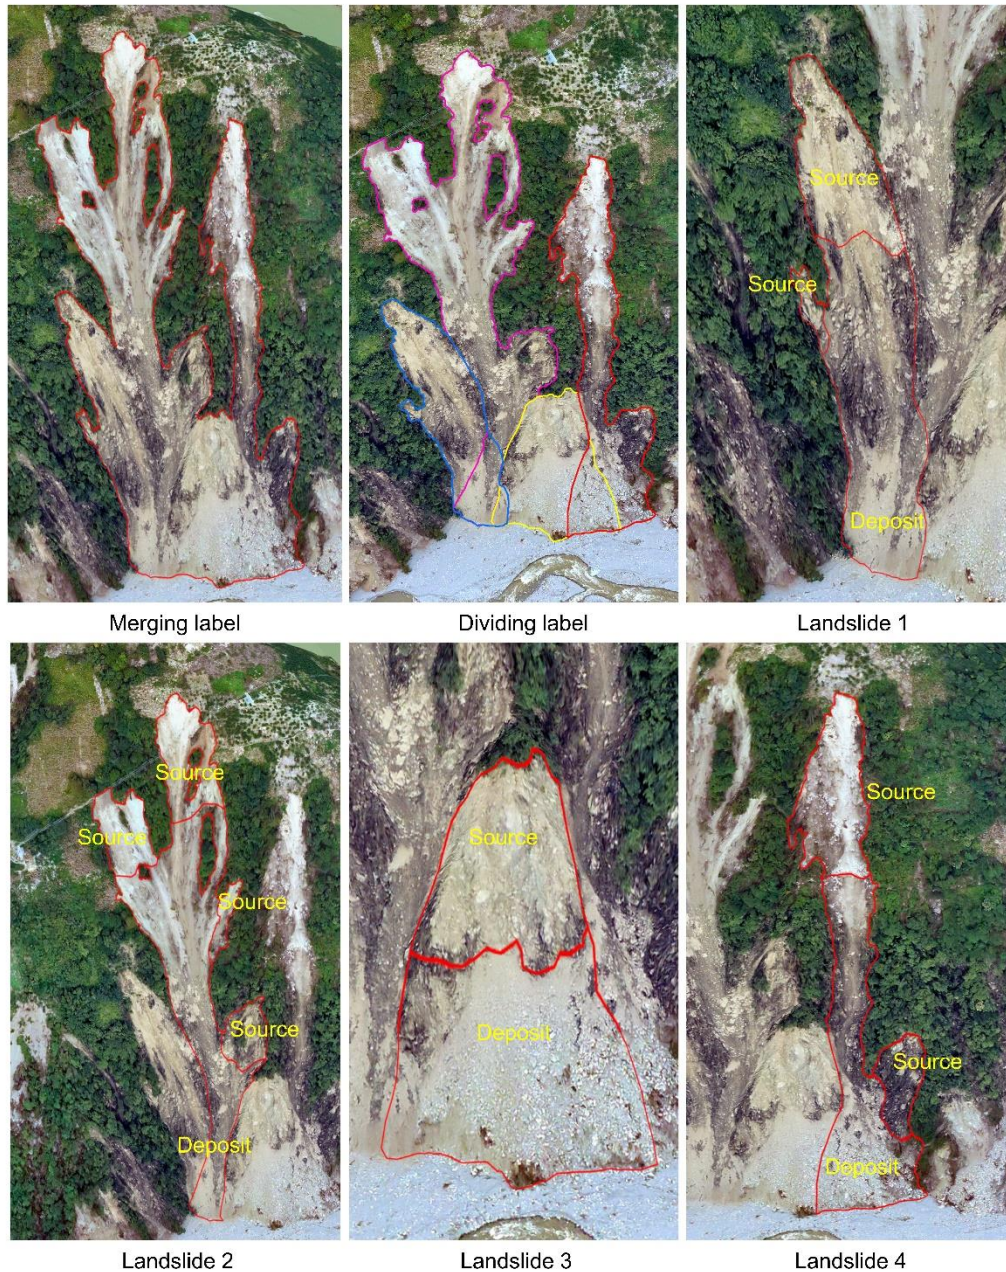

**Figure.S10** Example of instance landslide label (2022 Luding earthquake-triggered landslides)

Globally Distributed Coseismic Landslide Dataset (GDCLD):  
<https://doi.org/10.5281/zenodo.13612636>.

Data description:

The training dataset and the validation dataset are composed of UAV, PlanetScope, Gaofen-6 and Map World images of the 5 earthquake regions of Luding, Nippes, Hokkaido, Jiuzhaigou and Mainling. There is no overlapping

area in each TIFF. The training dataset and the validation dataset are randomly divided at a ratio of approximately 0.75:0.25.

#### train\_dataset:

train\_data: The train dataset part of the GDCLD data set contains 11162 data matrices (TIFF), and the shape of the matrix is (1024, 1024, 3) (TIFF).

train\_label: The train dataset part of the GDCLD data set contains 11162 data matrices (TIFF), and the shape of the matrix is (1024, 1024, 1) (TIFF).

#### Validation\_dataset

val\_data: The validation dataset part of the GDCLD data set contains 4459 data matrices (TIFF), and the shape of the matrix is (1024, 1024, 3) (TIFF).

val\_label: The validation dataset part of the GDCLD data set contains 4459 data matrices (TIFF), and the shape of the matrix is (1024, 1024, 1) (TIFF).

#### Test\_dataset (Lushan, Sumatra, Mesetas and Palu dataset)

This package contains the original files of remote sensing images from three sources: UAV, Map World, and PlaneScope belonging to the Lushan, Sumatra, Mesetas and Palu earthquake regions, which are used to display the test area.

#### Future work (Gansu, Meizhou, Huailian)

This package contains the original files of PlanetScope images belonging to the Meizhou and Hualian regions. The landslides in Meizhou area were induced by rainfall, while those in Hualian area were induced by earthquake. The Meizhou folder contains two tif data sets, Meizhou\_1 is a PlaneScope image after a rainfall event (2024.05.14), and Meizhou\_result is the landslide result automatically identified by the model. The Hualian folder contains two tif data sets, Hualian\_1 is a PlaneScope image after an earthquake event (2024.04.17 and 2024.04.29), and Hualian\_result is the landslide result automatically identified by the model.
